# Supplementary material for: Safety, Tolerability, and Immunogenicity of Measles and Rubella Vaccine Delivered with a High-Density Microarray Patch: Results from a Randomized, Partially Double-Blinded, Placebo-Controlled Phase I Clinical Trial
Source: MDPI journal article supplement (doi:10.3390/vaccines11111725), 2023-11-17
Supplement: s1 [file s1]

## Supplementary information

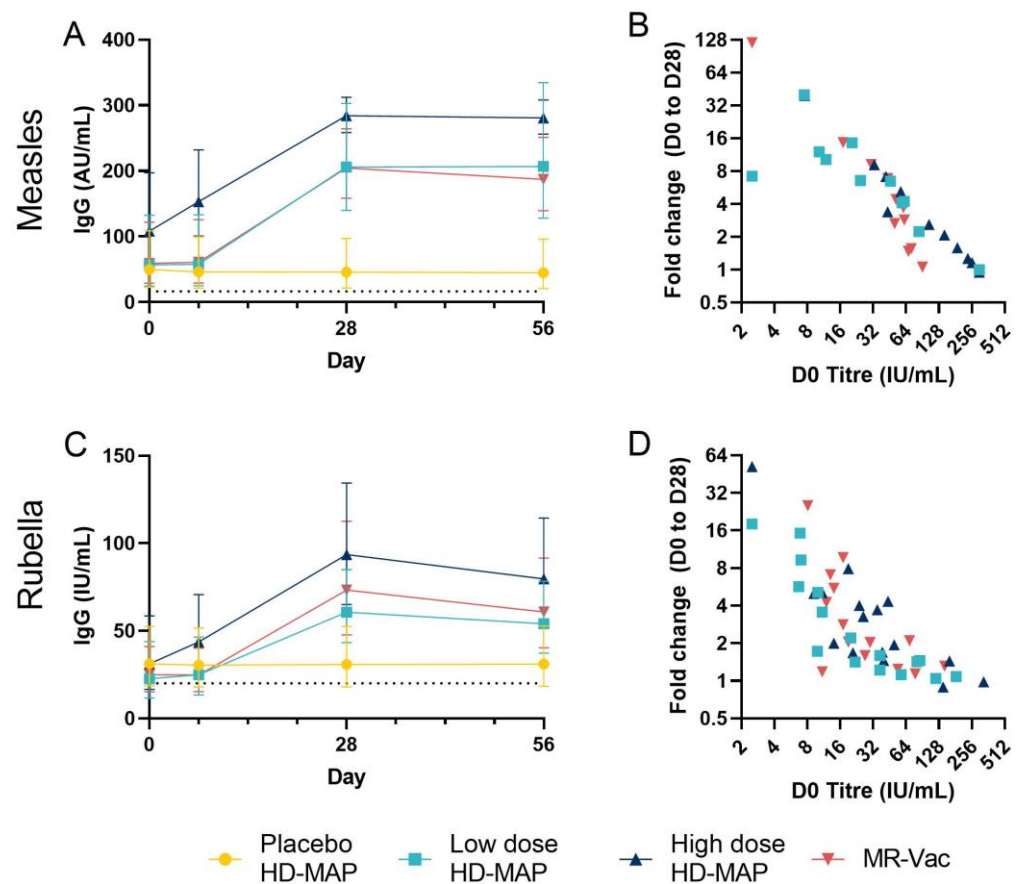

Figure S1. ELISA responses. IgG antibody concentrations for measles (A) and rubella (B). Serum was collected from subjects at Day 0, 7, 28, and 56 and IgG was measured using standard serological assays. The geometric mean of the IgG titer (AU/mL for measles, IU/mL for rubella) and 95% CI are shown for each group and day. The dotted line on the y-axis of each graph represents the positive threshold for each virus (16.5 IU/mL for measles, 20 IU/mL for rubella). The relationship between D0 titer (x-axis) and D28 fold change (y-axis) is shown for B) Measles and D) Rubella. In both graphs, each point represents a single subject, colored by group.

Supplementary Table S1. Measles and rubella IgG responses

|                        | Uncoated<br>HD-MAP<br>n=14 | Low-dose<br>HD-MAP<br>n=16 | High-dose<br>HD-MAP<br>n=16 | MR-Vac<br>n=14     |
|------------------------|----------------------------|----------------------------|-----------------------------|--------------------|
| <b>Measles (AU/ml)</b> |                            |                            |                             |                    |
| <b>Day 0</b>           |                            |                            |                             |                    |
| Geometric Mean Titer   | 49.675                     | 56.877                     | 108.318                     | 59.309             |
| (95% CI)               | (22.704 - 108.69)          | (24.418 - 132.484)         | (59.474 - 197.275)          | (28.837 - 121.982) |
| Positive, No. (%)      | 11 (78.6)                  | 12 (75.0)                  | 15 (93.8)                   | 13 (92.9)          |
| <b>Day 7</b>           |                            |                            |                             |                    |
| Geometric Mean Titer   | 46.155                     | 57.764                     | 153.138                     | 60.718             |
| (95% CI)               | (21.437 - 99.377)          | (25.038 - 133.261)         | (100.939 - 232.33)          | (29.331 - 125.69)  |
| Positive, No. (%)      | 11 (78.6)                  | 12 (75.0)                  | 16 (100.00)                 | 12 (85.7)          |

---

|                        |                   |                     |                     |                     |
|------------------------|-------------------|---------------------|---------------------|---------------------|
| <b>Day 28</b>          |                   |                     |                     |                     |
| Geometric Mean Titer   | 45.67             | 205.783             | 284.125             | 204.619             |
| (95% CI)               | (21.447 - 97.249) | (139.796 - 302.917) | (258.661 - 312.094) | (158.45 - 264.241)  |
| Positive, No. (%)      | 11 (78.6)         | 16 (100.0)          | 16 (100.00)         | 14 (100.00)         |
| <b>Day 56</b>          |                   |                     |                     |                     |
| Geometric Mean Titer   | 44.711            | 206.974             | 280.885             | 187.143             |
| (95% CI)               | (20.757 - 96.306) | (128.06 - 334.515)  | (256.152 - 308.007) | (139.473 - 251.105) |
| Positive, No. (%)      | 11 (78.6)         | 15 (93.8)           | 16 (100.00)         | 14 (100.00)         |
| <b>Rubella (IU/ml)</b> |                   |                     |                     |                     |
| <b>Day 0</b>           |                   |                     |                     |                     |
| Geometric Mean Titer   | 31.201            | 22.639              | 31.143              | 24.962              |
| (95% CI)               | (18.538 - 52.516) | (11.705 - 43.784)   | (16.566 - 58.548)   | (15.172 - 41.069)   |
| Positive, No. (%)      | 12 (85.7)         | 11 (68.8)           | 14 (87.5)           | 13 (92.9)           |
| <b>Day 7</b>           |                   |                     |                     |                     |
| Geometric Mean Titer   | 30.406            | 24.909              | 43.682              | 24.798              |
| (95% CI)               | (17.899 - 51.653) | (13.377 - 46.385)   | (26.985 - 70.711)   | (15.322 - 40.135)   |
| Positive, No. (%)      | 12 (85.7)         | 12(75.00)           | 16 (100.00)         | 13 (92.9)           |
| <b>Day 28</b>          |                   |                     |                     |                     |
| Geometric Mean Titer   | 30.845            | 60.635              | 93.552              | 73.255              |
| (95% CI)               | (18.08 - 52.622)  | (43.307 - 84.895)   | (65.116 - 134.406)  | (47.658 - 112.601)  |
| Positive, No. (%)      | 12 (85.7)         | 16 (100.00)         | 16 (100.00)         | 14 (100.00)         |
| <b>Day 56</b>          |                   |                     |                     |                     |
| Geometric Mean Titer   | 31.112            | 54.030              | 79.631              | 60.762              |
| (95% CI)               | (18.33 - 52.805)  | (37.272 - 78.32)    | (55.39 - 114.481)   | (40.326 - 91.555)   |
| Positive, No. (%)      | 12 (85.7)         | 16 (100.00)         | 16 (100.00)         | 14 (100.00)         |
